# Supplementary material
Source: HighWire-hosted journal article supplement (https://jnm.snmjournals.org/highwire/filestream/94363/field_highwire_adjunct_files/0/98590_Supplemental_Data.pdf)
Supplement: 98590_Supplemental_Data.pdf [file 98590_Supplemental_Data.pdf]

**Supplemental Table 1:** ROC Analysis of changes of different imaging parameters to predict poor survival (PFS or OS < median)

|                                           | <b>Survival parameter</b> | <b>AUC</b> | <b>p-value</b> | <b>Best cut-point</b> | <b>Sensitivity (%)</b> | <b>Specificity (%)</b> | <b>95% CI</b> |
|-------------------------------------------|---------------------------|------------|----------------|-----------------------|------------------------|------------------------|---------------|
| <b>TBR<sub>max</sub> FET-2 vs. FET-1</b>  | PFS                       | 0.72       | 0.06           | -10%                  | 50                     | 92                     | 0.50–0.94     |
| <b>TBR<sub>max</sub> FET-2 vs. FET-1</b>  | OS                        | 0.75       | 0.04           | -20%                  | 83                     | 67                     | 0.54–0.95     |
| <b>TBR<sub>max</sub> FET-3 vs. FET-1</b>  | PFS                       | 0.71       | 0.08           | -15%                  | 64                     | 75                     | 0.50–0.93     |
| <b>TBR<sub>mean</sub> FET-2 vs. FET-1</b> | PFS                       | 0.71       | 0.08           | -5%                   | 67                     | 75                     | 0.51–0.93     |
| <b>TBR<sub>mean</sub> FET-2 vs. FET-1</b> | OS                        | 0.72       | 0.07           | -5%                   | 67                     | 75                     | 0.50–0.94     |

AUC = Area under curve

**Supplemental Table 2:** Prognostic impact of TBR<sub>max</sub> and TBR<sub>mean</sub> on survival tested at different cut-off values

|                           |                      | FET-2 versus FET-1 |         |             |         | FET-3 versus FET-1 |         |             |         |
|---------------------------|----------------------|--------------------|---------|-------------|---------|--------------------|---------|-------------|---------|
|                           |                      | PFS [months]       | p-value | OS [months] | p-value | PFS [months]       | p-value | OS [months] | p-value |
| <b>TBR<sub>max</sub></b>  | Responder ≤ -10%     | 9.3 (n=17)         | 0.002*  | 15.4 (n=17) | <0.001* | 8.3 (n=17)         | 0.14    | 15.4 (n=17) | 0.02*   |
|                           | Non-Responder > -10% | 4.7 (n=6)          |         | 8.5 (n=6)   |         | 5.2 (n=7)          |         | 9.3 (n=7)   |         |
| <b>TBR<sub>max</sub></b>  | Responder ≤ -15%     | 9.3 (n=15)         | 0.05*   | 16.1 (n=15) | 0.001*  | 7.8 (n=12)         | 0.53    | 15.4 (n=12) | 0.27    |
|                           | Non-Responder > -15% | 5.1 (n=8)          |         | 9.3 (n=8)   |         | 5.5 (n=12)         |         | 9.3 (n=12)  |         |
| <b>TBR<sub>max</sub></b>  | Responder ≤ -20%     | 9.3 (n=10)         | 0.54    | 16.1 (n=10) | 0.02*   | 7.8 (n=8)          | 0.87    | 14.8 (n=8)  | 0.45    |
|                           | Non-Responder > -20% | 5.8 (n=13)         |         | 9.3 (n=13)  |         | 5.8 (n=16)         |         | 9.9 (n=16)  |         |
| <b>TBR<sub>mean</sub></b> | Responder ≤ 0%       | 7.8 (n=18)         | 0.017*  | 14.8 (n=18) | 0.004*  | 7.8 (n=13)         | 0.75    | 14.8 (n=13) | 0.8     |
|                           | Non-Responder > 0%   | 5.1 (n=5)          |         | 9.3 (n=5)   |         | 5.5 (n=11)         |         | 14.3 (n=11) |         |

|                           |                      |             |         |             |         |            |      |             |      |
|---------------------------|----------------------|-------------|---------|-------------|---------|------------|------|-------------|------|
| <b>TBR<sub>mean</sub></b> | Responder ≤ -5%      | 10.3 (n=14) | <0.001* | 16.1 (n=14) | <0.001* | 7.2 (n=11) | 0.76 | 16.1 (n=11) | 0.54 |
|                           | Non-Responder > -5%  | 5.1 (n=9)   |         | 9.3 (n=9)   |         | 8.3 (n=13) |      | 14.3 (n=13) |      |
| <b>TBR<sub>mean</sub></b> | Responder ≤ -10%     | 10.3 (n=8)  | 0.013*  | 20.9 (n=8)  | 0.011*  | 7.8 (n=8)  | 0.33 | 16.1 (n=8)  | 0.5  |
|                           | Non-Responder > -10% | 5.8 (n=15)  |         | 9.8 (n=15)  |         | 5.8 (n=16) |      | 13.8 (n=16) |      |

**Supplemental Table 3:** Prognostic impact of  $T_{vol 1.6}$  on survival tested at different cut-off values

|               |                             | FET-2 versus FET-1 |             |                |             | FET-3 versus FET-1 |             |                |             |
|---------------|-----------------------------|--------------------|-------------|----------------|-------------|--------------------|-------------|----------------|-------------|
|               |                             | PFS<br>[months]    | p-<br>value | OS<br>[months] | p-<br>value | PFS<br>[months]    | p-<br>value | OS<br>[months] | p-<br>value |
| $T_{vol 1.6}$ | Responder<br>$\leq 0\%$     | 9.3<br>(n=16)      | 0.04*       | 14.8<br>(n=15) | 0.39        | 9.4<br>(n=15)      | 0.002*      | 16.1<br>(n=15) | 0.06        |
|               | Non-Responder<br>$> 0\%$    | 5.8<br>(n=8)       |             | 9.8<br>(n=8)   |             | 5.1<br>(n=10)      |             | 9.9<br>(n=10)  |             |
| $T_{vol 1.6}$ | Responder<br>$< 0\%$        | 6.6<br>(n=12)      | 0.37        | 14.8<br>(n=12) | 0.39        | 7.8<br>(n=10)      | 0.58        | 14.8<br>(n=10) | 0.57        |
|               | Non-Responder<br>$\geq 0\%$ | 7.2<br>(n=12)      |             | 9.9<br>(n=12)  |             | 5.8<br>(n=15)      |             | 13.8<br>(n=15) |             |

**Supplemental Table 4:** Prognostic impact of Gd-Volume on survival tested at different cut-off values

|                  |                         | MRI-2 versus MRI-1 |         |             |         | MRI-3 versus MRI-1 |         |             |         |
|------------------|-------------------------|--------------------|---------|-------------|---------|--------------------|---------|-------------|---------|
|                  |                         | PFS [months]       | p-value | OS [months] | p-value | PFS [months]       | p-value | OS [months] | p-value |
| <b>Gd-Volume</b> | Responder $\leq 0\%$    | 6.6 (n=14)         |         | 14.3 (n=14) |         | 10.3 (n=10)        |         | 14.8 (n=10) |         |
|                  | Non-Responder $> 0\%$   | 8.3 (n=7)          | 0.65    | 16.1 (n=7)  | 0.83    | 7.2 (n=11)         | 0.23    | 14.3 (n=11) | 0.38    |
| <b>Gd-Volume</b> | Responder $\leq -25\%$  | 6.6 (n=11)         |         | 15.4 (n=11) |         | 12.9 (n=6)         |         | 22.8 (n=6)  |         |
|                  | Non-Responder $> -25\%$ | 7.8 (n=10)         | 0.97    | 13.8 (n=10) | 0.65    | 7.2 (n=15)         | 0.1     | 14.3 (n=15) | 0.06    |
